# Supplementary material for: Meat-Borne-Parasite: A Nanopore-Based Meta-Barcoding Work-Flow for Parasitic Microbiodiversity Assessment in the Wild Fauna of French Guiana
Source: MDPI journal article supplement (doi:10.3390/cimb46050237), 2024-04-24
Supplement: s1 [file s1]

**Table S1.** Nanopore and Illumina absolute frequency of Apicomplexa-assigned reads at taxonomic level 7.

# Constructed from biom file

Animal Species

Tissues

#OTU ID

D\_0\_Eukaryota;D\_1\_SAR;D\_2\_Alveolata;D\_3\_Apicomplexa;D\_5\_Piroplasmorida;D\_6\_Theileria;D\_7\_Theileria cervi  
D\_0\_Eukaryota;D\_1\_SAR;D\_2\_Alveolata;D\_3\_Apicomplexa;D\_6\_Eimeriorina;D\_7\_Sarcocystis;\_  
D\_0\_Eukaryota;D\_1\_SAR;D\_2\_Alveolata;D\_3\_Apicomplexa;D\_5\_Piroplasmorida;D\_6\_Theileria;D\_7\_Theileria sp. NG-2012b  
D\_0\_Eukaryota;D\_1\_SAR;D\_2\_Alveolata;D\_3\_Apicomplexa;D\_5\_Coccidia;D\_6\_Eimeriorina;\_  
D\_0\_Eukaryota;D\_1\_SAR;D\_2\_Alveolata;D\_3\_Apicomplexa;D\_6\_Eimeriorina;D\_7\_Toxoplasma;\_  
D\_0\_Eukaryota;D\_1\_SAR;D\_2\_Alveolata;D\_3\_Apicomplexa;D\_6\_Eimeriorina;D\_7\_Sarcocystis;D\_8\_Sarcocystis neurona  
D\_0\_Eukaryota;D\_1\_SAR;D\_2\_Alveolata;D\_3\_Apicomplexa;D\_5\_Piroplasmorida;D\_6\_Babesia;D\_7\_Babesia sp. capybara 1  
D\_0\_Eukaryota;D\_1\_SAR;D\_2\_Alveolata;D\_3\_Apicomplexa;D\_5\_Piroplasmorida;D\_6\_Theileria;D\_7\_Theileria sp. 2 PJH-2012  
D\_0\_Eukaryota;D\_1\_SAR;D\_2\_Alveolata;D\_3\_Apicomplexa;D\_5\_Piroplasmorida;D\_6\_Theileria;D\_7\_Theileria equi  
D\_0\_Eukaryota;D\_1\_SAR;D\_2\_Alveolata;D\_3\_Apicomplexa;D\_5\_Piroplasmorida;D\_6\_Theileria;\_  
D\_0\_Eukaryota;D\_1\_SAR;D\_2\_Alveolata;D\_3\_Apicomplexa;D\_5\_Piroplasmorida;D\_6\_Theileria;D\_7\_Theileria sp. NG-2013a  
D\_0\_Eukaryota;D\_1\_SAR;D\_2\_Alveolata;D\_3\_Apicomplexa;D\_6\_Eimeriorina;\_;\_  
D\_0\_Eukaryota;D\_1\_SAR;D\_2\_Alveolata;D\_3\_Apicomplexa;D\_5\_Coccidia;D\_6\_Eimeriorina;D\_7\_Coccidia sp. ex Cricetus cricetus  
D\_0\_Eukaryota;D\_1\_SAR;D\_2\_Alveolata;D\_3\_Apicomplexa;\_;\_  
D\_0\_Eukaryota;D\_1\_SAR;D\_2\_Alveolata;D\_3\_Apicomplexa;D\_5\_Coccidia;D\_6\_Eimeriorina;D\_7\_Eimeriidae sp. RY-2014  
D\_0\_Eukaryota;D\_1\_SAR;D\_2\_Alveolata;D\_3\_Apicomplexa;D\_5\_Piroplasmorida;D\_6\_Theileria;D\_7\_Theileria ovis  
D\_0\_Eukaryota;D\_1\_SAR;D\_2\_Alveolata;D\_3\_Apicomplexa;D\_5\_Piroplasmorida;D\_6\_Theileria;D\_7\_Theileria equi strain WA  
D\_0\_Eukaryota;D\_1\_SAR;D\_2\_Alveolata;D\_3\_Apicomplexa;D\_5\_Piroplasmorida;D\_6\_Theileria;D\_7\_Theileria sp.  
D\_0\_Eukaryota;D\_1\_SAR;D\_2\_Alveolata;D\_3\_Apicomplexa;D\_6\_Adeleorina;D\_7\_Hepatozoon;\_  
D\_0\_Eukaryota;D\_1\_SAR;D\_2\_Alveolata;D\_3\_Apicomplexa;D\_6\_Adeleorina;D\_7\_Hepatozoon;D\_8\_Hepatozoon sp. European pine marten 1  
D\_0\_Eukaryota;D\_1\_SAR;D\_2\_Alveolata;D\_3\_Apicomplexa;D\_6\_Eimeriorina;D\_7\_Sarcocystis;D\_8\_Frenkelia glareoli  
D\_0\_Eukaryota;D\_1\_SAR;D\_2\_Alveolata;D\_3\_Apicomplexa;D\_6\_Eimeriorina;D\_7\_Besnoitia;D\_8\_Besnoitia bennetti  
D\_0\_Eukaryota;D\_1\_SAR;D\_2\_Alveolata;D\_3\_Apicomplexa;D\_6\_Adeleorina;D\_7\_Hepatozoon;D\_8\_Hepatozoon sp. I35  
D\_0\_Eukaryota;D\_1\_SAR;D\_2\_Alveolata;D\_3\_Apicomplexa;D\_5\_Piroplasmorida;D\_6\_Theileria;D\_7\_Theileria sp. G164  
D\_0\_Eukaryota;D\_1\_SAR;D\_2\_Alveolata;D\_3\_Apicomplexa;D\_6\_Eimeriorina;D\_7\_Sarcocystis;D\_8\_Sarcocystis dispersa  
D\_0\_Eukaryota;D\_1\_SAR;D\_2\_Alveolata;D\_3\_Apicomplexa;D\_6\_Eimeriorina;D\_7\_Frenkelia;D\_8\_Frenkelia microti  
D\_0\_Eukaryota;D\_1\_SAR;D\_2\_Alveolata;D\_3\_Apicomplexa;D\_6\_Eimeriorina;D\_7\_Sarcocystis;D\_8\_Sarcocystis miescheriana  
D\_0\_Eukaryota;D\_1\_SAR;D\_2\_Alveolata;D\_3\_Apicomplexa;D\_6\_Eimeriorina;D\_7\_Sarcocystis;D\_8\_Sarcocystis sp.  
D\_0\_Eukaryota;D\_1\_SAR;D\_2\_Alveolata;D\_3\_Apicomplexa;D\_6\_Eimeriorina;D\_7\_Sarcocystis;D\_8\_Sarcocystis scandinavica  
D\_0\_Eukaryota;D\_1\_SAR;D\_2\_Alveolata;D\_3\_Apicomplexa;D\_5\_Piroplasmorida;D\_6\_Theileria;D\_7\_Theileria sp. North Texas white-tailed deer  
D\_0\_Eukaryota;D\_1\_SAR;D\_2\_Alveolata;D\_3\_Apicomplexa;D\_6\_Eimeriorina;D\_7\_Toxoplasma;D\_8\_Ovis aries musimon (mouflon)  
D\_0\_Eukaryota;D\_1\_SAR;D\_2\_Alveolata;D\_3\_Apicomplexa;D\_5\_Piroplasmorida;D\_6\_Theileria;D\_7\_Theileria sp. NG-2013c  
D\_0\_Eukaryota;D\_1\_SAR;D\_2\_Alveolata;D\_3\_Apicomplexa;D\_6\_Eimeriorina;D\_7\_Isospora;\_  
D\_0\_Eukaryota;D\_1\_SAR;D\_2\_Alveolata;D\_3\_Apicomplexa;D\_5\_Piroplasmorida;D\_6\_Babesia;\_  
D\_0\_Eukaryota;D\_1\_SAR;D\_2\_Alveolata;D\_3\_Apicomplexa;D\_5\_Piroplasmorida;D\_6\_Babesia;D\_7\_Babesia sp. MA#230  
D\_0\_Eukaryota;D\_1\_SAR;D\_2\_Alveolata;D\_3\_Apicomplexa;D\_6\_Eimeriorina;D\_7\_Isospora;D\_8\_Isospora wiegmanniana  
D\_0\_Eukaryota;D\_1\_SAR;D\_2\_Alveolata;D\_3\_Apicomplexa;D\_6\_Eimeriorina;D\_7\_Besnoitia;\_  
D\_0\_Eukaryota;D\_1\_SAR;D\_2\_Alveolata;D\_3\_Apicomplexa;D\_5\_Piroplasmorida;D\_6\_Babesia;D\_7\_Babesia sp. sable antelope/2005  
D\_0\_Eukaryota;D\_1\_SAR;D\_2\_Alveolata;D\_3\_Apicomplexa;D\_5\_Piroplasmorida;D\_6\_Theileria;D\_7\_Theileria sp. ex Syncerus caffer  
MCO-2011 D\_0\_Eukaryota;D\_1\_SAR;D\_2\_Alveolata;D\_3\_Apicomplexa;D\_6\_Eimeriorina;D\_7\_Sarcocystis;D\_8\_Sarcocystis arctica  
D\_0\_Eukaryota;D\_1\_SAR;D\_2\_Alveolata;D\_3\_Apicomplexa;D\_6\_Eugregarinorida;\_;\_  
D\_0\_Eukaryota;D\_1\_SAR;D\_2\_Alveolata;D\_3\_Apicomplexa;D\_5\_Piroplasmorida;D\_6\_Babesia;D\_7\_Babesia sp. 1-1658  
D\_0\_Eukaryota;D\_1\_SAR;D\_2\_Alveolata;D\_3\_Apicomplexa;D\_6\_Eimeriorina;D\_7\_Toxoplasma;D\_8\_Toxoplasma gondii RH  
D\_0\_Eukaryota;D\_1\_SAR;D\_2\_Alveolata;D\_3\_Apicomplexa;D\_6\_Adeleorina;D\_7\_Hepatozoon;D\_8\_Hepatozoon ursi  
D\_0\_Eukaryota;D\_1\_SAR;D\_2\_Alveolata;D\_3\_Apicomplexa;D\_6\_Eimeriorina;D\_7\_Eimeria;\_  
D\_0\_Eukaryota;D\_1\_SAR;D\_2\_Alveolata;D\_3\_Apicomplexa;D\_5\_Piroplasmorida;D\_6\_Theileria;D\_7\_Theileria sp. H8

[illegible]

[illegible]

| Mazama americana<br>Tongue | Mazama americana<br>Heart | Hydrochoerus hydrochaeris<br>Lung | Cuniculus paca<br>Tongue | Mazama americana<br>Lung | Tapirus terrestris<br>Heart |
|----------------------------|---------------------------|-----------------------------------|--------------------------|--------------------------|-----------------------------|
| G0233L2_Illumina           | G0233CR2_Illumina         | G0068P1_ONT                       | G0113L_ONT               | G0125P1.2_ONT            | G0130CR1_ONT                |
| 75.0                       | 637.0                     | 1.0                               | 1.0                      | 4448.0                   | 0.0                         |
| 506.0                      | 98.0                      | 0.0                               | 19766.0                  | 1.0                      | 0.0                         |
| 0.0                        | 0.0                       | 0.0                               | 0.0                      | 3127.0                   | 0.0                         |
| 0.0                        | 0.0                       | 0.0                               | 0.0                      | 0.0                      | 0.0                         |
| 0.0                        | 0.0                       | 0.0                               | 0.0                      | 0.0                      | 0.0                         |
| 0.0                        | 0.0                       | 0.0                               | 1029.0                   | 0.0                      | 0.0                         |
| 0.0                        | 0.0                       | 6280.0                            | 1.0                      | 0.0                      | 0.0                         |
| 0.0                        | 0.0                       | 0.0                               | 0.0                      | 451.0                    | 0.0                         |
| 0.0                        | 0.0                       | 0.0                               | 0.0                      | 0.0                      | 18.0                        |
| 67.0                       | 1098.0                    | 0.0                               | 0.0                      | 397.0                    | 2.0                         |
| 0.0                        | 0.0                       | 0.0                               | 0.0                      | 0.0                      | 3.0                         |
| 0.0                        | 0.0                       | 0.0                               | 96.0                     | 0.0                      | 2.0                         |
| 0.0                        | 0.0                       | 0.0                               | 0.0                      | 0.0                      | 0.0                         |
| 0.0                        | 0.0                       | 0.0                               | 0.0                      | 0.0                      | 1.0                         |
| 0.0                        | 0.0                       | 0.0                               | 0.0                      | 0.0                      | 0.0                         |
| 0.0                        | 0.0                       | 0.0                               | 0.0                      | 82.0                     | 0.0                         |
| 0.0                        | 0.0                       | 0.0                               | 0.0                      | 0.0                      | 0.0                         |
| 0.0                        | 0.0                       | 0.0                               | 0.0                      | 0.0                      | 0.0                         |
| 0.0                        | 0.0                       | 0.0                               | 0.0                      | 0.0                      | 0.0                         |
| 0.0                        | 0.0                       | 0.0                               | 0.0                      | 0.0                      | 0.0                         |
| 0.0                        | 0.0                       | 0.0                               | 66.0                     | 0.0                      | 0.0                         |
| 0.0                        | 0.0                       | 0.0                               | 0.0                      | 0.0                      | 0.0                         |
| 0.0                        | 0.0                       | 0.0                               | 0.0                      | 0.0                      | 0.0                         |
| 0.0                        | 0.0                       | 0.0                               | 0.0                      | 22.0                     | 0.0                         |
| 0.0                        | 0.0                       | 0.0                               | 14.0                     | 0.0                      | 0.0                         |
| 0.0                        | 0.0                       | 0.0                               | 15.0                     | 0.0                      | 0.0                         |
| 0.0                        | 0.0                       | 0.0                               | 0.0                      | 0.0                      | 0.0                         |
| 0.0                        | 0.0                       | 0.0                               | 65.0                     | 0.0                      | 0.0                         |
| 241.0                      | 0.0                       | 0.0                               | 0.0                      | 0.0                      | 0.0                         |
| 0.0                        | 0.0                       | 0.0                               | 0.0                      | 5.0                      | 0.0                         |
| 0.0                        | 0.0                       | 0.0                               | 0.0                      | 0.0                      | 0.0                         |
| 0.0                        | 0.0                       | 0.0                               | 0.0                      | 6.0                      | 0.0                         |
| 0.0                        | 0.0                       | 0.0                               | 0.0                      | 0.0                      | 2.0                         |
| 0.0                        | 0.0                       | 0.0                               | 0.0                      | 0.0                      | 0.0                         |
| 0.0                        | 0.0                       | 0.0                               | 0.0                      | 0.0                      | 0.0                         |
| 0.0                        | 0.0                       | 0.0                               | 0.0                      | 0.0                      | 0.0                         |
| 0.0                        | 0.0                       | 0.0                               | 0.0                      | 0.0                      | 1.0                         |
| 0.0                        | 0.0                       | 0.0                               | 0.0                      | 0.0                      | 0.0                         |
| 0.0                        | 0.0                       | 0.0                               | 0.0                      | 0.0                      | 0.0                         |
| 0.0                        | 0.0                       | 0.0                               | 0.0                      | 1.0                      | 0.0                         |
| 0.0                        | 0.0                       | 0.0                               | 1.0                      | 0.0                      | 0.0                         |
| 0.0                        | 0.0                       | 0.0                               | 0.0                      | 0.0                      | 0.0                         |
| 0.0                        | 0.0                       | 0.0                               | 0.0                      | 0.0                      | 0.0                         |
| 0.0                        | 0.0                       | 0.0                               | 0.0                      | 0.0                      | 0.0                         |
| 0.0                        | 0.0                       | 0.0                               | 0.0                      | 0.0                      | 0.0                         |
| 0.0                        | 0.0                       | 0.0                               | 0.0                      | 0.0                      | 0.0                         |
| 0.0                        | 0.0                       | 0.0                               | 0.0                      | 0.0                      | 0.0                         |
| 0.0                        | 0.0                       | 0.0                               | 0.0                      | 0.0                      | 1.0                         |
| 0.0                        | 0.0                       | 0.0                               | 0.0                      | 0.0                      | 0.0                         |

| Tapirus terrestris? | Tapirus terrestris? | Dasypus sp. nov.? | Cuniculus paca? | Mazama americana? | Mazama americana? |
|---------------------|---------------------|-------------------|-----------------|-------------------|-------------------|
| Heart               | Lung                | Tongue            | Heart           | Tongue            | Heart             |
| G0130CR2_ONT        | G0130P_ONT          | G0149LD_ONT       | G0150CR1_ONT    | G0233L2_ONT       | G0233CR2_ONT      |
| 0.0                 | 1.0                 | 0.0               | 0.0             | 2239.0            | 3107.0            |
| 0.0                 | 1.0                 | 3118.0            | 0.0             | 2.0               | 0.0               |
| 0.0                 | 0.0                 | 0.0               | 0.0             | 939.0             | 493.0             |
| 0.0                 | 0.0                 | 0.0               | 143.0           | 0.0               | 0.0               |
| 0.0                 | 0.0                 | 0.0               | 643.0           | 0.0               | 0.0               |
| 0.0                 | 0.0                 | 173.0             | 0.0             | 0.0               | 0.0               |
| 0.0                 | 0.0                 | 0.0               | 0.0             | 0.0               | 0.0               |
| 0.0                 | 0.0                 | 0.0               | 0.0             | 694.0             | 592.0             |
| 261.0               | 742.0               | 0.0               | 0.0             | 0.0               | 0.0               |
| 37.0                | 72.0                | 0.0               | 0.0             | 776.0             | 1230.0            |
| 31.0                | 127.0               | 0.0               | 0.0             | 0.0               | 0.0               |
| 0.0                 | 0.0                 | 21.0              | 7.0             | 0.0               | 0.0               |
| 0.0                 | 0.0                 | 0.0               | 2.0             | 0.0               | 0.0               |
| 0.0                 | 0.0                 | 0.0               | 3.0             | 0.0               | 0.0               |
| 0.0                 | 0.0                 | 0.0               | 6.0             | 0.0               | 0.0               |
| 0.0                 | 0.0                 | 0.0               | 0.0             | 53.0              | 29.0              |
| 11.0                | 87.0                | 0.0               | 0.0             | 0.0               | 0.0               |
| 0.0                 | 0.0                 | 0.0               | 0.0             | 1.0               | 0.0               |
| 0.0                 | 122.0               | 0.0               | 0.0             | 0.0               | 0.0               |
| 0.0                 | 15.0                | 0.0               | 0.0             | 0.0               | 0.0               |
| 0.0                 | 0.0                 | 23.0              | 0.0             | 0.0               | 0.0               |
| 0.0                 | 0.0                 | 0.0               | 4.0             | 0.0               | 0.0               |
| 0.0                 | 17.0                | 0.0               | 0.0             | 0.0               | 0.0               |
| 0.0                 | 0.0                 | 0.0               | 0.0             | 8.0               | 3.0               |
| 0.0                 | 0.0                 | 0.0               | 0.0             | 0.0               | 0.0               |
| 0.0                 | 0.0                 | 9.0               | 0.0             | 0.0               | 0.0               |
| 0.0                 | 0.0                 | 4.0               | 0.0             | 0.0               | 0.0               |
| 0.0                 | 0.0                 | 7.0               | 0.0             | 0.0               | 0.0               |
| 0.0                 | 0.0                 | 0.0               | 0.0             | 4.0               | 0.0               |
| 0.0                 | 0.0                 | 0.0               | 0.0             | 13.0              | 23.0              |
| 0.0                 | 0.0                 | 0.0               | 1.0             | 0.0               | 0.0               |
| 0.0                 | 0.0                 | 0.0               | 0.0             | 1.0               | 0.0               |
| 2.0                 | 0.0                 | 0.0               | 0.0             | 0.0               | 0.0               |
| 8.0                 | 1.0                 | 0.0               | 0.0             | 0.0               | 0.0               |
| 1.0                 | 0.0                 | 0.0               | 0.0             | 0.0               | 0.0               |
| 0.0                 | 0.0                 | 0.0               | 0.0             | 0.0               | 0.0               |
| 0.0                 | 0.0                 | 0.0               | 0.0             | 0.0               | 0.0               |
| 1.0                 | 0.0                 | 0.0               | 0.0             | 0.0               | 0.0               |
| 0.0                 | 0.0                 | 0.0               | 0.0             | 0.0               | 0.0               |
| 0.0                 | 0.0                 | 0.0               | 0.0             | 0.0               | 0.0               |
| 1.0                 | 0.0                 | 0.0               | 0.0             | 0.0               | 0.0               |
| 0.0                 | 0.0                 | 0.0               | 0.0             | 0.0               | 0.0               |
| 0.0                 | 1.0                 | 0.0               | 0.0             | 0.0               | 0.0               |
| 0.0                 | 0.0                 | 0.0               | 0.0             | 0.0               | 0.0               |
| 0.0                 | 0.0                 | 0.0               | 0.0             | 1.0               | 0.0               |
