# Supplementary material for: Meat-Borne-Parasite: A Nanopore-Based Meta-Barcoding Work-Flow for Parasitic Microbiodiversity Assessment in the Wild Fauna of French Guiana
Source: MDPI journal article supplement (doi:10.3390/cimb46050237), 2024-04-24
Supplement: s1 [file s1]

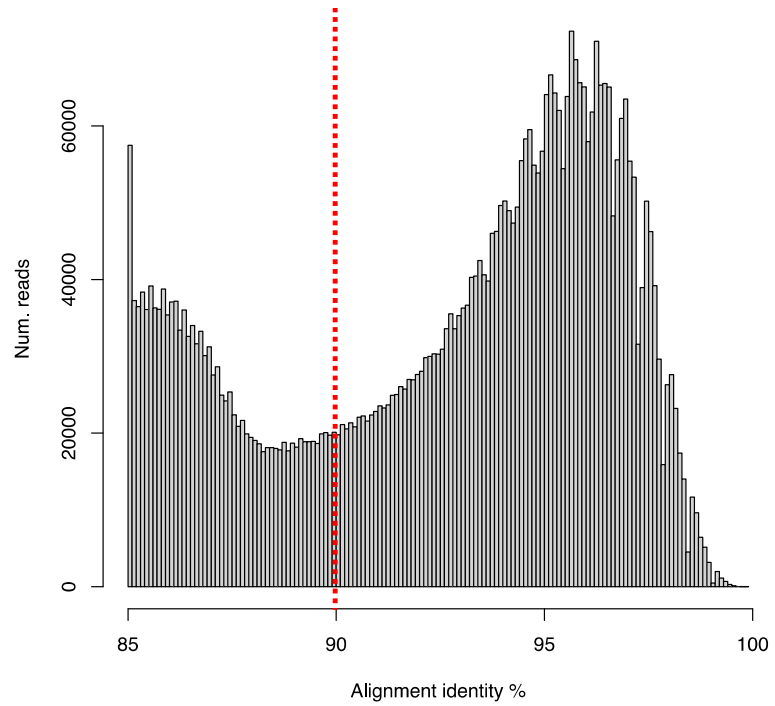

**Figure S1. Nanopore sequencing reads alignment identity distribution.** The alignment identity of Nanopore sequencing reads to Silva database is shown. A dashed red line represents minimum identity threshold used for filtering hits.
